# Supplementary material for: Symptoms of Addictive Eating: What Do Different Health Professions Think?
Source: MDPI journal article supplement (doi:10.3390/bs11050060), 2021-04-26
Supplement: s1 [file s1]

**Table S1** Agreement with addictive eating symptoms by health profession (%)

| Statement                                                                                      | Agree/Disagree    | Dietitian<br>(n=66) | Psychologist/<br>Psychotherapist/<br>Counsellor<br>(n=28) | Other health<br>practitioner<br>(n=23) | Health<br>researcher<br>or<br>academic<br>(n=18) | GP<br>/Medical<br>Specialist/<br>Medical<br>Registrar<br>(n=7) | Total (n=142) |
|------------------------------------------------------------------------------------------------|-------------------|---------------------|-----------------------------------------------------------|----------------------------------------|--------------------------------------------------|----------------------------------------------------------------|---------------|
| Certain foods produce physiological effects in the brain rewards system                        | Strongly agree    | 40.9                | 28.6                                                      | 47.8                                   | 50.0                                             | 85.7                                                           | 43.0          |
|                                                                                                | Agree             | 45.5                | 28.6                                                      | 43.5                                   | 44.4                                             | 14.3                                                           | 40.1          |
|                                                                                                | Neutral           | 7.6                 | 17.9                                                      | 4.4                                    | 5.6                                              | 0.0                                                            | 8.5           |
|                                                                                                | Disagree          | 1.5                 | 10.7                                                      | 0.0                                    | 0.0                                              | 0.0                                                            | 2.8           |
|                                                                                                | Strongly disagree | 4.6                 | 14.3                                                      | 4.4                                    | 0.0                                              | 0.0                                                            | 5.6           |
| People repeatedly try to give up particular foods with many unsuccessful attempts              | Strongly agree    | 51.5                | 53.6                                                      | 47.8                                   | 61.1                                             | 42.9                                                           | 52.1          |
|                                                                                                | Agree             | 43.9                | 35.7                                                      | 39.1                                   | 27.8                                             | 57.1                                                           | 40.1          |
|                                                                                                | Neutral           | 1.5                 | 3.6                                                       | 4.4                                    | 5.6                                              | 0.0                                                            | 2.8           |
|                                                                                                | Disagree          | 1.5                 | 3.6                                                       | 4.4                                    | 0.0                                              | 0.0                                                            | 2.1           |
|                                                                                                | Strongly disagree | 1.5                 | 3.6                                                       | 4.4                                    | 5.6                                              | 0.0                                                            | 2.8           |
| People can continue eating certain foods even when that causes family or work problems         | Strongly agree    | 39.4                | 46.4                                                      | 43.5                                   | 50.0                                             | 28.6                                                           | 42.3          |
|                                                                                                | Agree             | 30.3                | 21.4                                                      | 21.7                                   | 22.2                                             | 28.6                                                           | 26.1          |
|                                                                                                | Neutral           | 18.2                | 17.9                                                      | 17.4                                   | 16.7                                             | 42.9                                                           | 19.0          |
|                                                                                                | Disagree          | 6.1                 | 7.1                                                       | 4.4                                    | 0.0                                              | 0.0                                                            | 4.9           |
|                                                                                                | Strongly disagree | 6.1                 | 7.1                                                       | 13.0                                   | 11.1                                             | 0.0                                                            | 7.8           |
| People continue to over consume food despite the increased risk of adverse health consequences | Strongly agree    | 59.1                | 50.0                                                      | 65.2                                   | 66.7                                             | 85.7                                                           | 60.6          |
|                                                                                                | Agree             | 22.7                | 7.1                                                       | 26.1                                   | 16.7                                             | 14.3                                                           | 19.0          |
|                                                                                                | Neutral           | 9.1                 | 14.3                                                      | 0.0                                    | 11.1                                             | 0.0                                                            | 8.5           |
|                                                                                                | Disagree          | 1.5                 | 3.6                                                       | 0.0                                    | 0.0                                              | 0.0                                                            | 1.4           |
|                                                                                                | Strongly disagree | 7.6                 | 25.0                                                      | 8.7                                    | 5.6                                              | 0.0                                                            | 10.6          |
| People can have an increased tolerance of foods that are                                       | Strongly agree    | 27.3                | 21.4                                                      | 26.1                                   | 33.3                                             | 28.6                                                           | 26.8          |
|                                                                                                | Agree             | 37.9                | 17.9                                                      | 34.8                                   | 11.1                                             | 57.1                                                           | 31.0          |

|                                                                                                                         |                      |      |      |      |      |      |      |
|-------------------------------------------------------------------------------------------------------------------------|----------------------|------|------|------|------|------|------|
| regularly over consumed<br>without experiencing any<br>satiety effects                                                  | Neutral              | 15.2 | 25.0 | 26.1 | 27.8 | 14.3 | 20.4 |
|                                                                                                                         | Disagree             | 10.6 | 14.3 | 8.7  | 16.7 | 0.0  | 11.3 |
|                                                                                                                         | Strongly<br>disagree | 9.1  | 21.4 | 4.4  | 11.1 | 0.0  | 10.6 |
|                                                                                                                         |                      |      |      |      |      |      |      |
| People exhibit withdrawal<br>symptoms (e.g. irritability,<br>headaches, dizziness) when<br>trying to give up some foods | Strongly agree       | 15.2 | 14.3 | 65.2 | 33.3 | 28.6 | 26.1 |
|                                                                                                                         | Agree                | 43.9 | 35.7 | 13.0 | 38.9 | 28.6 | 35.9 |
|                                                                                                                         | Neutral              | 21.2 | 17.9 | 13.0 | 11.1 | 42.9 | 19.0 |
|                                                                                                                         | Disagree             | 7.6  | 10.7 | 4.4  | 11.1 | 0.0  | 7.8  |
|                                                                                                                         | Strongly<br>disagree | 12.1 | 21.4 | 4.4  | 5.6  | 0.0  | 11.3 |
| People over consume food in<br>excessive amounts                                                                        | Strongly agree       | 40.9 | 39.3 | 52.2 | 55.6 | 71.4 | 45.8 |
|                                                                                                                         | Agree                | 37.9 | 14.3 | 34.8 | 33.3 | 28.6 | 31.7 |
|                                                                                                                         | Neutral              | 6.1  | 17.9 | 8.7  | 5.6  | 0.0  | 8.5  |
|                                                                                                                         | Disagree             | 4.6  | 7.1  | 0.0  | 0.0  | 0.0  | 3.5  |
|                                                                                                                         | Strongly<br>disagree | 10.6 | 21.4 | 4.4  | 5.6  | 0.0  | 10.6 |
| People exhibit/report strong<br>cravings or desire to consume<br>particular foods or food types                         | Strongly agree       | 48.5 | 42.9 | 60.9 | 66.7 | 71.4 | 52.8 |
|                                                                                                                         | Agree                | 42.4 | 32.1 | 26.1 | 33.3 | 28.6 | 35.9 |
|                                                                                                                         | Neutral              | 6.1  | 14.3 | 8.7  | 0.0  | 0.0  | 7.0  |
|                                                                                                                         | Disagree             | 1.5  | 3.6  | 0.0  | 0.0  | 0.0  | 1.4  |
|                                                                                                                         | Strongly<br>disagree | 1.5  | 7.1  | 4.4  | 0.0  | 0.0  | 2.8  |
| People can exhibit associations<br>with food and food behaviours<br>that could be likened to an<br>addiction            | Strongly agree       | 36.4 | 28.6 | 56.5 | 50.0 | 71.4 | 41.6 |
|                                                                                                                         | Agree                | 39.4 | 21.4 | 21.7 | 27.8 | 14.3 | 30.3 |
|                                                                                                                         | Neutral              | 7.6  | 17.9 | 8.7  | 16.7 | 14.3 | 11.3 |
|                                                                                                                         | Disagree             | 9.1  | 3.6  | 4.4  | 0.0  | 0.0  | 5.6  |
|                                                                                                                         | Strongly<br>disagree | 7.6  | 28.6 | 8.7  | 5.6  | 0.0  | 11.3 |
| People can exhibit associations<br>with food and food behaviours<br>that impact on their daily<br>functioning           | Strongly agree       | 31.8 | 53.6 | 56.5 | 50.0 | 71.4 | 44.4 |
|                                                                                                                         | Agree                | 59.1 | 25.0 | 39.1 | 27.8 | 28.6 | 43.7 |
|                                                                                                                         | Neutral              | 6.1  | 17.9 | 0.0  | 11.1 | 0.0  | 7.8  |
|                                                                                                                         | Disagree             | 0.0  | 0.0  | 0.0  | 5.6  | 0.0  | 0.7  |

|                                                                                                               |                   |      |      |      |      |       |      |
|---------------------------------------------------------------------------------------------------------------|-------------------|------|------|------|------|-------|------|
|                                                                                                               | Strongly disagree | 3.0  | 3.6  | 4.4  | 5.6  | 0.0   | 3.5  |
| People can overeat more foods when experiencing stress, anxiety or negative experiences (i.e. comfort eating) | Strongly agree    | 59.1 | 50.0 | 73.9 | 83.3 | 100.0 | 64.8 |
|                                                                                                               | Agree             | 34.9 | 21.4 | 17.4 | 16.7 | 0.0   | 25.4 |
|                                                                                                               | Neutral           | 4.6  | 17.9 | 4.4  | 0.0  | 0.0   | 6.3  |
|                                                                                                               | Disagree          | 0.0  | 3.6  | 0.0  | 0.0  | 0.0   | 0.7  |
|                                                                                                               | Strongly disagree | 1.5  | 7.1  | 4.4  | 0.0  | 0.0   | 2.8  |

**Table S2** Agreement with addictive eating symptoms by conditions that health professionals provide advice to clients/individuals for

| Addictive eating symptom                                                                                                               | Agreement (Mean±SD)               |                                |                                |                             |
|----------------------------------------------------------------------------------------------------------------------------------------|-----------------------------------|--------------------------------|--------------------------------|-----------------------------|
|                                                                                                                                        | Disordered eating (n=14)          | Overweight/ obesity (n=24)     | Both (n=76)                    | Neither (n=16)              |
| Certain foods produce physiological effects in the brain rewards system <sup>a</sup>                                                   | 3.2±1.4 <sup>b, c, d</sup>        | 4.6±0.6 <sup>b</sup>           | 4.0±1.1 <sup>c</sup>           | 4.3±0.6 <sup>d</sup>        |
| People repeatedly try to give up particular foods with many unsuccessful attempts                                                      | 4.1±1.4                           | 4.5±0.7                        | 4.4±0.9                        | 4.5±0.6                     |
| People can continue eating certain foods even when that causes family or work problems                                                 | 3.3±1.5                           | 4.0±1.3                        | 3.9±1.2                        | 4.3±0.8                     |
| People continue to over consume food despite the increased risk of adverse health consequences <sup>a</sup>                            | 2.6±1.5 <sup>b, c, d</sup>        | 4.8±0.4 <sup>b</sup>           | 4.1±1.4 <sup>c</sup>           | 4.7±0.5 <sup>d</sup>        |
| People can have an increased tolerance of foods that are regularly over consumed without experiencing any satiety effects <sup>a</sup> | 2.2±1.2 <sup>b, c, d</sup>        | 4.2±0.8 <sup>b</sup>           | 3.5±1.3 <sup>c</sup>           | 4.2±0.8 <sup>d</sup>        |
| People exhibit withdrawal symptoms (e.g. irritability, headaches, dizziness) when trying to give up some foods <sup>a</sup>            | 2.2±1.1 <sup>b, c, d</sup>        | 4.1±0.8 <sup>b, e</sup>        | 3.4±1.3 <sup>c, e, f</sup>     | 4.4±0.7 <sup>d, f</sup>     |
| People over consume food in excessive amounts <sup>a</sup>                                                                             | 2.9±1.5 <sup>b, c, d</sup>        | 4.6±0.5 <sup>b, e</sup>        | 3.8±1.4 <sup>c, e</sup>        | 4.6±0.7 <sup>d</sup>        |
| People exhibit/report strong cravings or desire to consume particular foods or food types <sup>a</sup>                                 | 3.9±1.0 <sup>b</sup>              | 4.7±0.5 <sup>b</sup>           | 4.2±1.0                        | 4.5±0.7                     |
| People can exhibit associations with food and food behaviours that could be likened to an addiction <sup>a</sup>                       | 2.5±1.4 <sup>b, c, d</sup>        | 4.5±0.7 <sup>b, e</sup>        | 3.7±1.4 <sup>c, e</sup>        | 4.5±0.5 <sup>d</sup>        |
| People can exhibit associations with food and food behaviours that impact on their daily functioning                                   | 3.9±1.2                           | 4.5±0.5                        | 4.2±1.0                        | 4.4±0.7                     |
| People can overeat more foods when experiencing stress, anxiety or negative experiences (i.e. comfort eating) <sup>a</sup>             | 3.9±0.9 <sup>b</sup>              | 4.8±0.4 <sup>b</sup>           | 4.4±1.0                        | 4.6±0.5                     |
| <b>Average agreement <sup>a</sup></b>                                                                                                  | <b>3.1±0.7 <sup>b, c, d</sup></b> | <b>4.5±0.4 <sup>b, e</sup></b> | <b>4.0±0.9 <sup>c, e</sup></b> | <b>4.4±0.5 <sup>d</sup></b> |

N=12 indicated not applicable, therefore this is out of 130 respondents. <sup>a</sup> Indicates statistically significant difference overall assessed via one-way analysis of variance (p<0.05). <sup>b, c, d, e</sup> Cells with the same superscript letter indicates statistically significant difference between groups assessed via post-hoc Tukey test (p<0.05).

**Table S3** Agreement with addictive eating symptoms by population group/s that health professionals work with

| Addictive eating symptom                                                                                                               | Agreement (Mean±SD)                         |                                                 |                            |
|----------------------------------------------------------------------------------------------------------------------------------------|---------------------------------------------|-------------------------------------------------|----------------------------|
|                                                                                                                                        | Infants, children and/or adolescents (n=15) | Young adults, adults and/or older adults (n=92) | Across the lifespan (n=31) |
| Certain foods produce physiological effects in the brain rewards system                                                                | 4.4±0.5                                     | 4.2±1.1                                         | 3.9±1.3                    |
| People repeatedly try to give up particular foods with many unsuccessful attempts                                                      | 4.6±0.5                                     | 4.3±0.9                                         | 4.4±1.0                    |
| People can continue eating certain foods even when that causes family or work problems                                                 | 3.7±1.2                                     | 3.8±1.3                                         | 4.2±1.0                    |
| People continue to over consume food despite the increased risk of adverse health consequences                                         | 4.7±0.6                                     | 4.2±1.3                                         | 3.9±1.4                    |
| People can have an increased tolerance of foods that are regularly over consumed without experiencing any satiety effects <sup>a</sup> | 4.1±0.8 <sup>b</sup>                        | 3.6±1.3                                         | 3.1±1.2 <sup>b</sup>       |
| People exhibit withdrawal symptoms (e.g. irritability, headaches, dizziness) when trying to give up some foods                         | 4.1±0.7                                     | 3.6±1.3                                         | 3.4±1.3                    |
| People over consume food in excessive amounts                                                                                          | 4.2±0.7                                     | 4.0±1.4                                         | 3.9±1.3                    |
| People exhibit/report strong cravings or desire to consume particular foods or food types                                              | 4.5±0.6                                     | 4.3±0.9                                         | 4.3±1.0                    |
| People can exhibit associations with food and food behaviours that could be likened to an addiction                                    | 4.1±0.7                                     | 4.0±1.2                                         | 3.5±1.6                    |
| People can exhibit associations with food and food behaviours that impact on their daily functioning                                   | 4.4±0.6                                     | 4.3±0.9                                         | 4.1±1.0                    |
| People can overeat more foods when experiencing stress, anxiety or negative experiences (i.e. comfort eating)                          | 4.8±0.4                                     | 4.5±0.9                                         | 4.3±1.0                    |
| <b>Average agreement</b>                                                                                                               | <b>4.3±0.4</b>                              | <b>4.1±0.9</b>                                  | <b>3.9±0.9</b>             |

N=4 indicated not applicable, therefore this is out of 138 respondents. <sup>a</sup> Indicates statistically significant difference overall between population groups that health professionals work with assessed via one-way analysis of variance (p<0.05). <sup>b, c, d, e</sup> Cells with the same superscript letter indicates statistically significant difference between groups assessed via post-hoc Tukey test (p<0.05).
